# Supplementary material
Source: MDPI journal article supplement (https://www.mdpi.com/2073-4344/5/3/1321)
Supplement: s1 [file s1]

## Supplementary Information

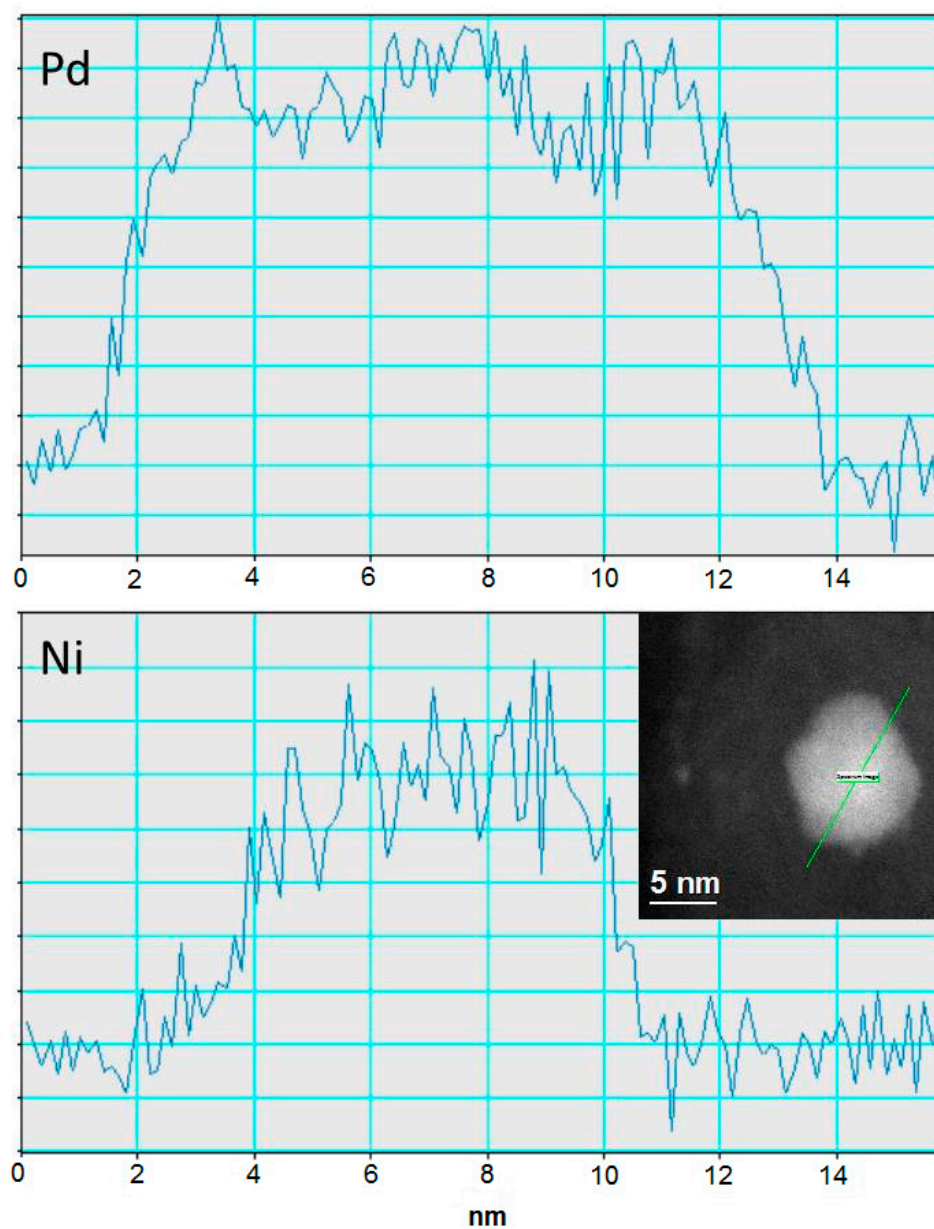

**Figure S1.** EELS line scan profile for Pd M-edge and Ni L-edge from a single nanoparticle along the scanned line as indicated in the inset.

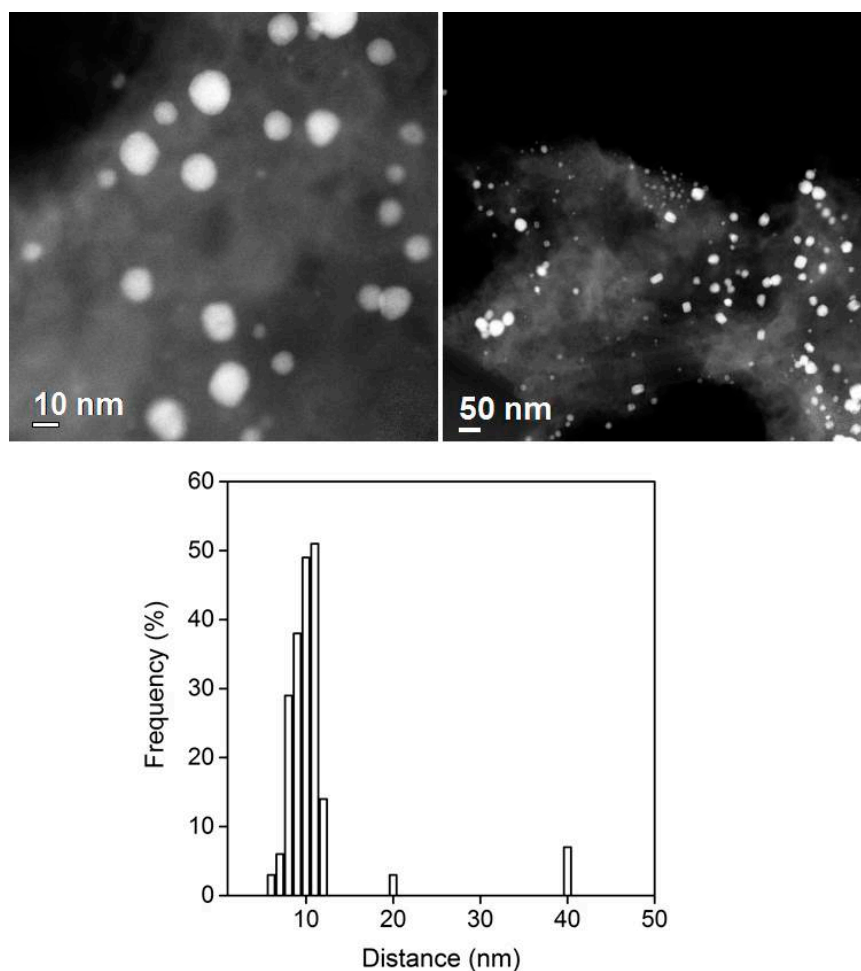

**Figure S2.** HAADF-STEM images of the PdNiN/C catalyst along with particle size distribution of the nanoparticles (sample size = 200).

© 2015 by the authors; licensee MDPI, Basel, Switzerland. This article is an open access article distributed under the terms and conditions of the Creative Commons Attribution license (<http://creativecommons.org/licenses/by/4.0/>).
